# Supplementary material for: Double metal synergistic synthetic urea: an electrocatalytic study
Source: Royal Society of Chemistry journal article supplement (doi:10.1039/d2nj00095d), 2022-01-01
Supplement: d2nj00095d1.pdf [file d2nj00095d1.pdf]

## **Supplementary Information**

# **Double metal synergistic synthetic urea: A Electrocatalytic Study**

Zhijia Zhang, Ling Guo\*, Jinping Du, Yingjun Hou

Key Laboratory of Magnetic Molecules & Magnetic Information Materials, Ministry of Education,  
The School of Chemistry and Material Science, Shanxi Normal University, Taiyuan 030031,  
China

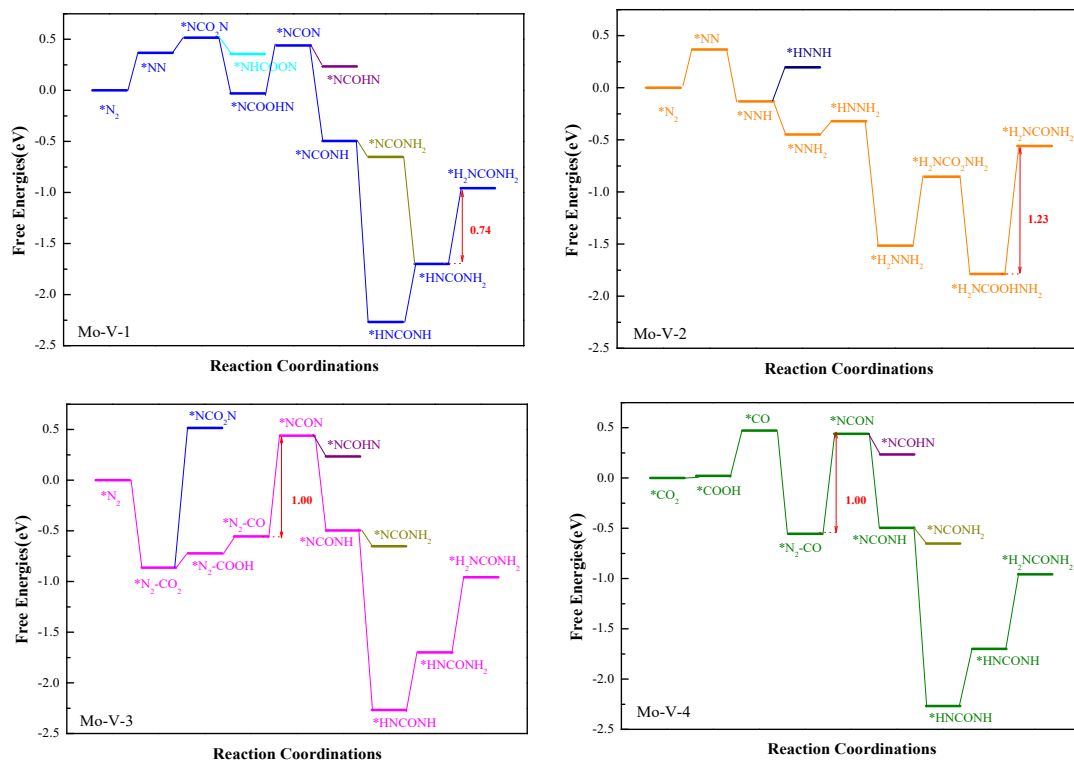

**Figure S1** Different paths of urea synthesis on MoVN<sub>6</sub>C, and the rate-limiting steps of each path are marked with red numbers.

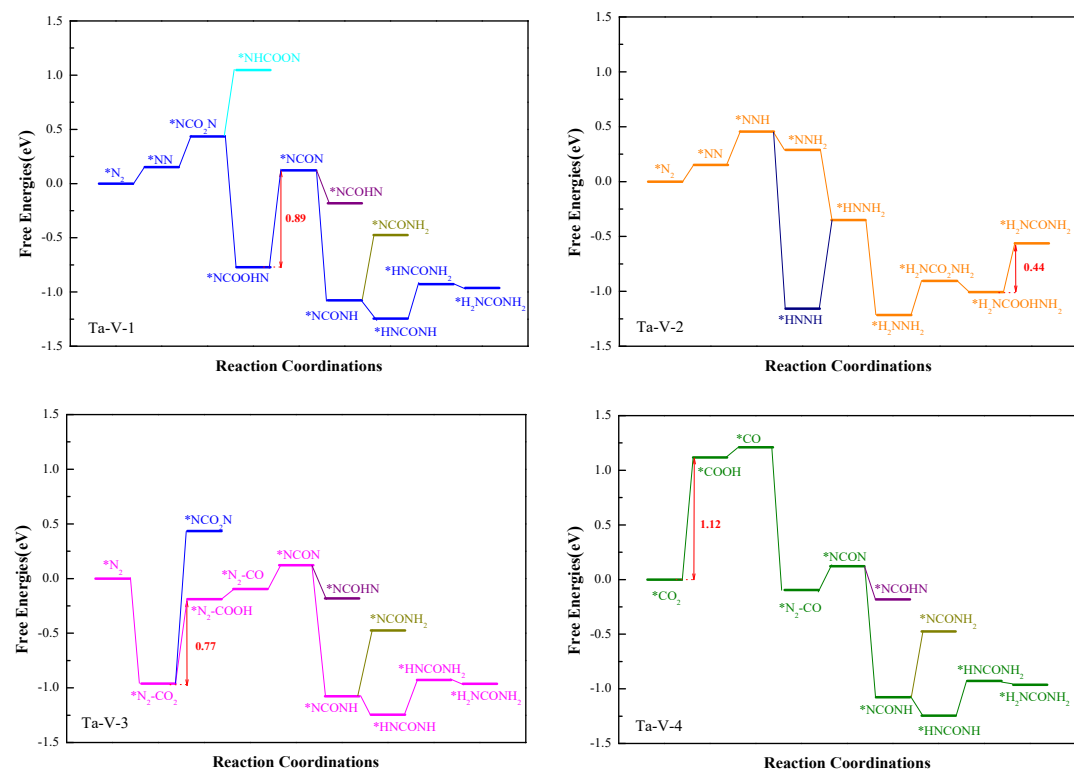

**Figure S2** Different paths of urea synthesis on TaVN<sub>6</sub>C, and the rate-limiting steps of each path are marked with red numbers.

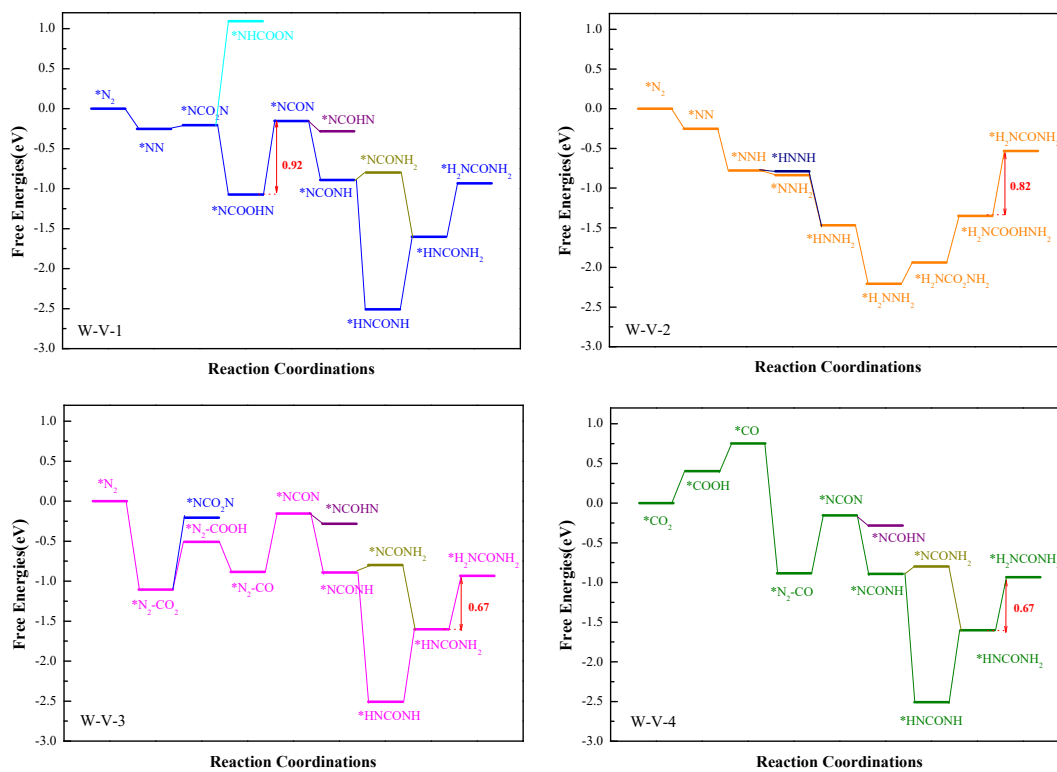

**Figure S3** Different paths of urea synthesis on WVN<sub>6</sub>C, and the rate-limiting steps of each path are marked with red numbers.

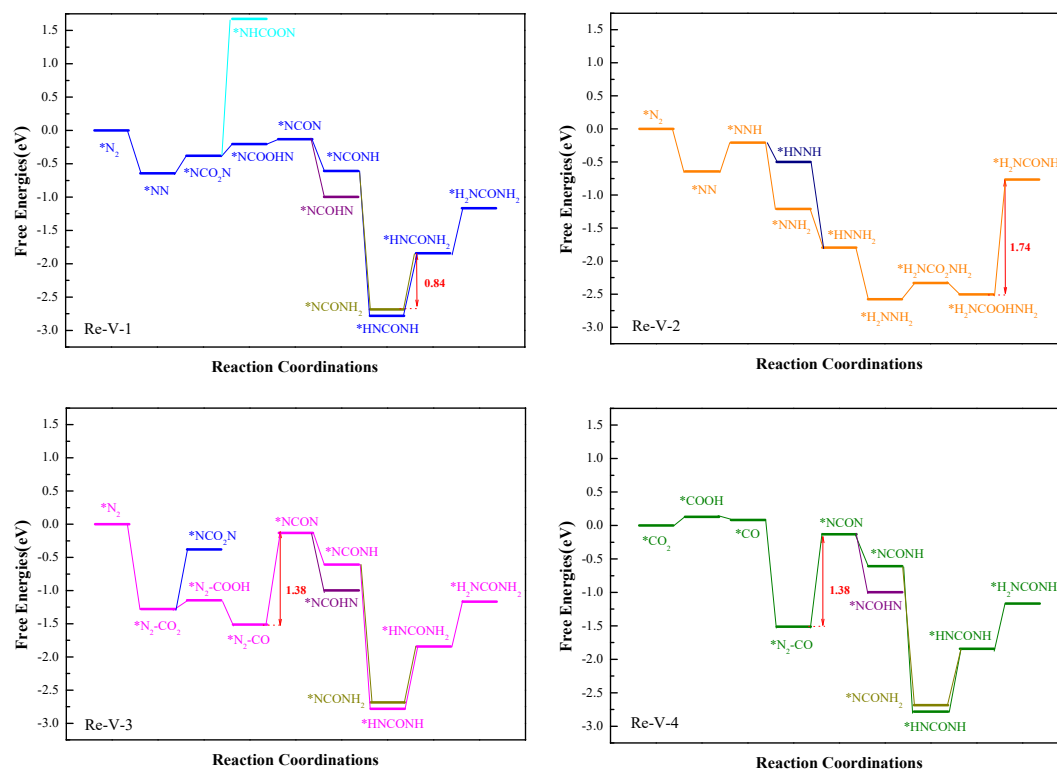

**Figure S4** Different paths of urea synthesis on ReVN<sub>6</sub>C, and the rate-limiting steps of each path are marked with red numbers.

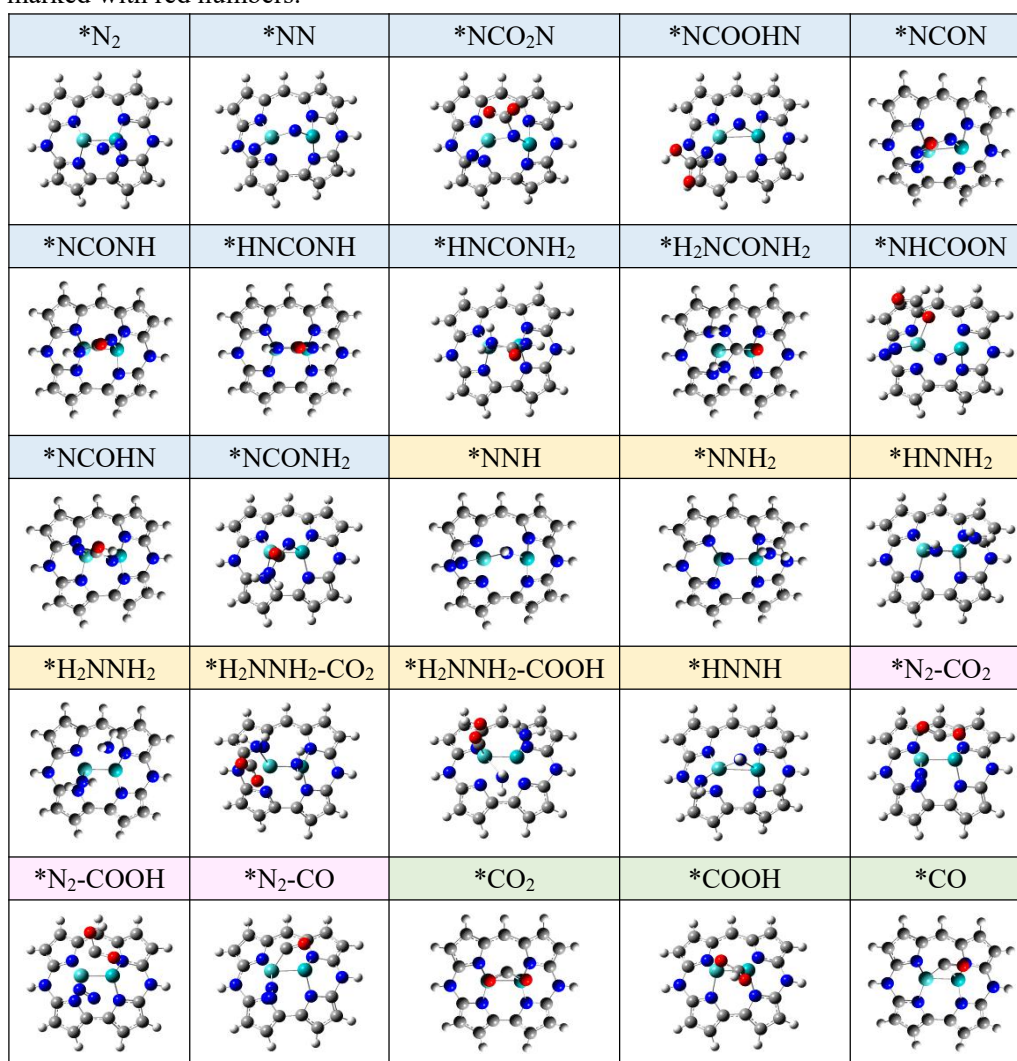

**Table S1** There are 25 geometric structures corresponding to different paths of urea synthesis on MoVN<sub>6</sub>C. Different shading colors (blue, orange, pink, green) represent four different paths.

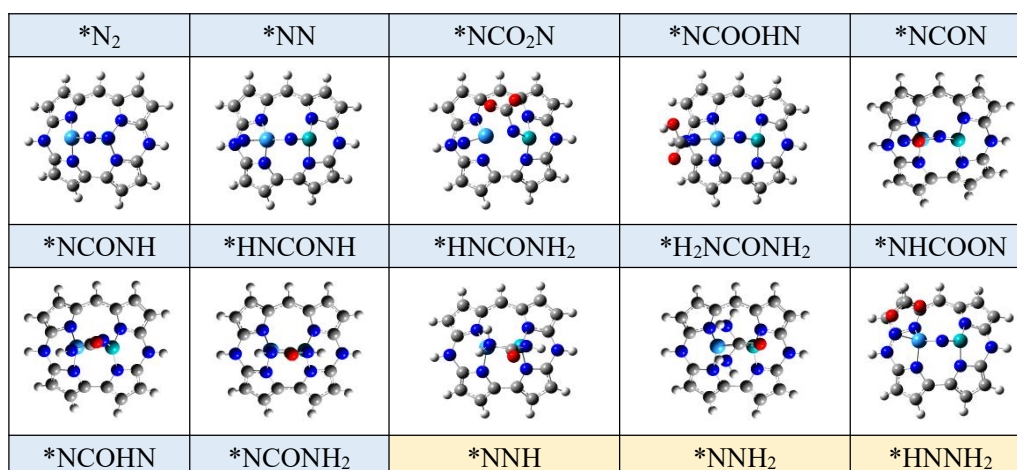

|                                                                                   |                                                                                   |                                                                                   |                                                                                    |                                                                                     |
|-----------------------------------------------------------------------------------|-----------------------------------------------------------------------------------|-----------------------------------------------------------------------------------|------------------------------------------------------------------------------------|-------------------------------------------------------------------------------------|
|  |  |  |  |  |
| *H <sub>2</sub> NNH <sub>2</sub>                                                  | *H <sub>2</sub> NNH <sub>2</sub> -CO <sub>2</sub>                                 | *H <sub>2</sub> NNH <sub>2</sub> -COOH                                            | *HNNH                                                                              | *N <sub>2</sub> -CO <sub>2</sub>                                                    |
|  |  |  |  |  |
| *N <sub>2</sub> -COOH                                                             | *N <sub>2</sub> -CO                                                               | *CO <sub>2</sub>                                                                  | *COOH                                                                              | *CO                                                                                 |
|  |  |  |  |  |

**Table S2** There are 25 geometric structures corresponding to different paths of urea synthesis on TaVN<sub>6</sub>C. Different shading colors (blue, orange, pink, green) represent four different paths.

|                                                                                     |                                                                                     |                                                                                     |                                                                                      |                                                                                       |
|-------------------------------------------------------------------------------------|-------------------------------------------------------------------------------------|-------------------------------------------------------------------------------------|--------------------------------------------------------------------------------------|---------------------------------------------------------------------------------------|
| *N <sub>2</sub>                                                                     | *NN                                                                                 | *NCO <sub>2</sub> N                                                                 | *NCOOHN                                                                              | *NCON                                                                                 |
|  |  |  |  |  |
| *NCONH                                                                              | *HNCONH                                                                             | *HNCONH <sub>2</sub>                                                                | *H <sub>2</sub> NCONH <sub>2</sub>                                                   | *NHCOON                                                                               |
|  |  |  |  |  |
| *NCOHN                                                                              | *NCONH <sub>2</sub>                                                                 | *NNH                                                                                | *NNH <sub>2</sub>                                                                    | *HNNH <sub>2</sub>                                                                    |
|  |  |  |  |  |
| *H <sub>2</sub> NNH <sub>2</sub>                                                    | *H <sub>2</sub> NNH <sub>2</sub> -CO <sub>2</sub>                                   | *H <sub>2</sub> NNH <sub>2</sub> -COOH                                              | *HNNH                                                                                | *N <sub>2</sub> -CO <sub>2</sub>                                                      |
|  |  |  |  |  |
| *N <sub>2</sub> -COOH                                                               | *N <sub>2</sub> -CO                                                                 | *CO <sub>2</sub>                                                                    | *COOH                                                                                | *CO                                                                                   |

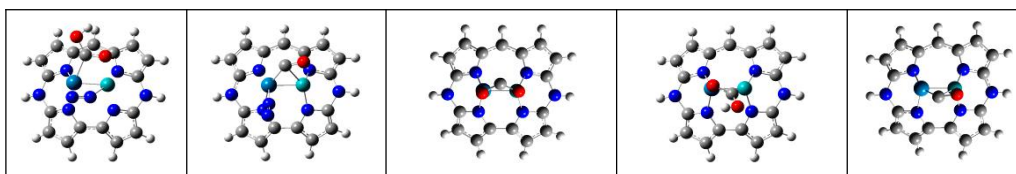

**Table S3** There are 25 geometric structures corresponding to different paths of urea synthesis on WVN<sub>6</sub>C. Different shading colors (blue, orange, pink, green) represent four different paths.

|                                  |                                                   |                                        |                                    |                                  |
|----------------------------------|---------------------------------------------------|----------------------------------------|------------------------------------|----------------------------------|
| *N <sub>2</sub>                  | *NN                                               | *NCO <sub>2</sub> N                    | *NCOOHN                            | *NCON                            |
|                                  |                                                   |                                        |                                    |                                  |
| *NCONH                           | *HNCONH                                           | *HNCONH <sub>2</sub>                   | *H <sub>2</sub> NCONH <sub>2</sub> | *NHCOON                          |
|                                  |                                                   |                                        |                                    |                                  |
| *NCOHN                           | *NCONH <sub>2</sub>                               | *NNH                                   | *NNH <sub>2</sub>                  | *HNNH <sub>2</sub>               |
|                                  |                                                   |                                        |                                    |                                  |
| *H <sub>2</sub> NNH <sub>2</sub> | *H <sub>2</sub> NNH <sub>2</sub> -CO <sub>2</sub> | *H <sub>2</sub> NNH <sub>2</sub> -COOH | *HNNH                              | *N <sub>2</sub> -CO <sub>2</sub> |
|                                  |                                                   |                                        |                                    |                                  |
| *N <sub>2</sub> -COOH            | *N <sub>2</sub> -CO                               | *CO <sub>2</sub>                       | *COOH                              | *CO                              |
|                                  |                                                   |                                        |                                    |                                  |

**Table S4** There are 25 geometric structures corresponding to different paths of urea synthesis on ReVN<sub>6</sub>C. Different shading colors (blue, orange, pink, green) represent four different paths.
